# Supplementary material for: Highly stable silver–platinum core–shell nanowires for H2O2 detection
Source: Royal Society of Chemistry journal article supplement (doi:10.1039/d1nr01976g), 2021-01-01
Supplement: d1nr01976g1.pdf [file d1nr01976g1.pdf]

## Supporting Information

### Highly Stable Silver-Platinum Core-Shell Nanowires for H<sub>2</sub>O<sub>2</sub> Detection

Serkan Koylan,<sup>1‡</sup> Sensu Tunca,<sup>1‡</sup> Gokhan Polat,<sup>5</sup> Mete Batuhan Durukan,<sup>1</sup> Dongkwan Kim,<sup>4</sup> Yunus Eren Kalay,<sup>1</sup> Seung Hwan Ko,<sup>4</sup> Husnu Emrah Unalan<sup>1,2,3,\*</sup>

<sup>1</sup> Department of Metallurgical and Materials Engineering, Middle East Technical University (METU), 06800, Ankara, TURKEY

<sup>2</sup> Centre for Solar Energy Research and Applications (GUNAM), METU, Ankara 06800, TURKEY

<sup>3</sup> Energy Storage Materials and Devices Research Center (ENDAM), METU, 06800, Ankara, TURKEY

<sup>4</sup> Applied Nano and Thermal Science Lab, Department of Mechanical Engineering, Seoul National University, Seoul, 08826, KOREA

<sup>5</sup> Department of Metallurgical and Materials Engineering, Faculty of Engineering, Necmettin Erbakan University, 42090 Konya, TURKEY

Corresponding Author: unalan@metu.edu.tr

KEYWORDS (silver nanowires, core-shell nanowires, stability, H<sub>2</sub>O<sub>2</sub> Detection).

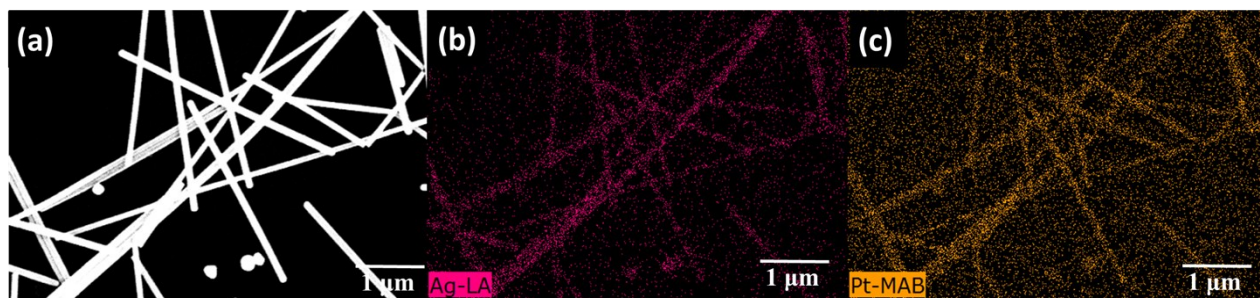

**Figure S1.** (a) SEM image of Ag-Pt core-shell NWs and corresponding EDS maps for (b) Ag and (c) Pt.

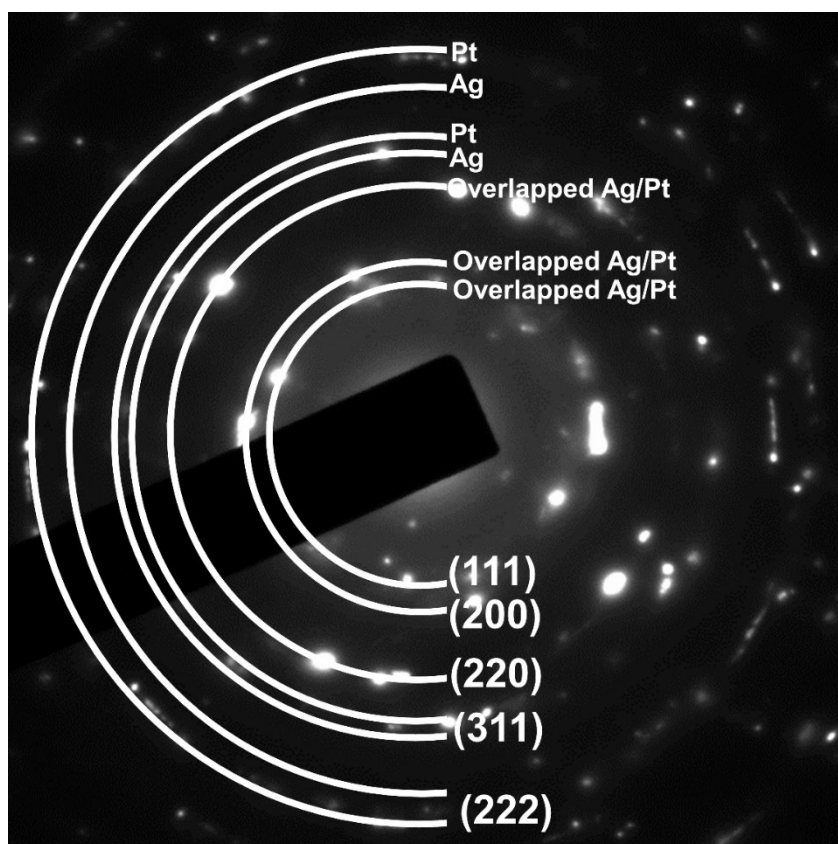

**Figure S2.** SAED image of Ag-Pt core-shell NWs. The half-rings on SAED are drawn for eye tracking.

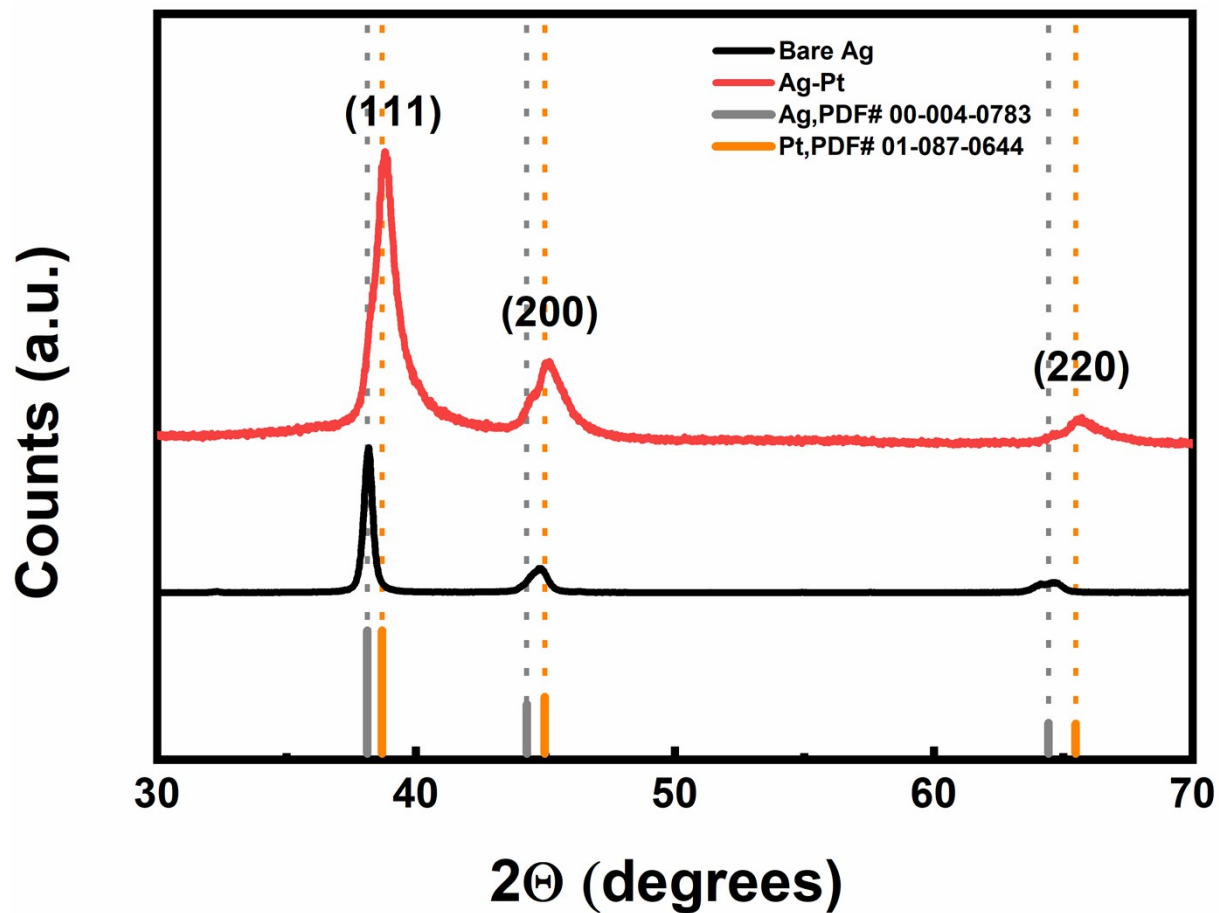

**Figure S3.** XRD patterns of bare Ag NWs (black) and Ag-Pt core-shell NWs (red).

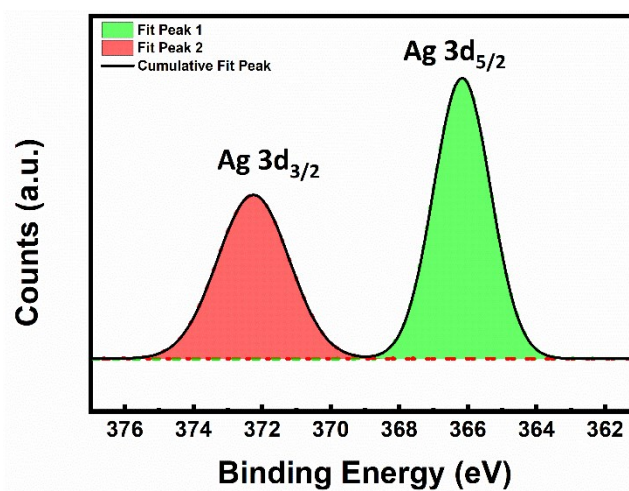

**Figure S4.** Fitted XPS spectra of Ag 3d<sub>3/2</sub> (372.2 eV) and Ag 3d<sub>5/2</sub> (366.2 eV) from bare Ag NWs.

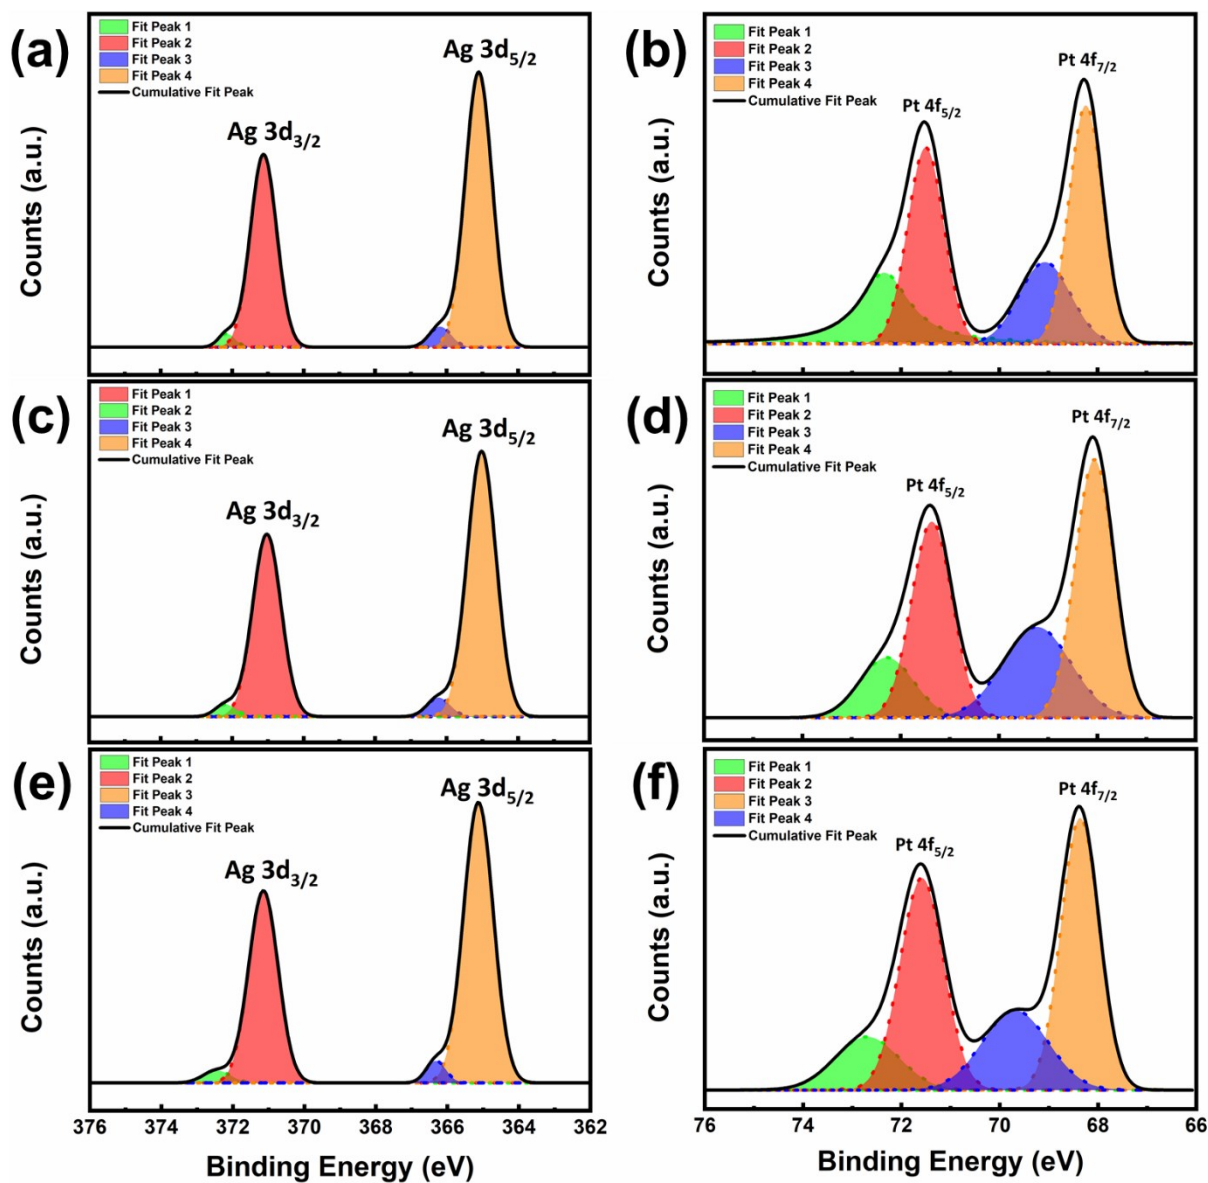

**Figure S5.** Fitted XPS spectra for Ag 3d and Pt 4f from Ag-Pt core-shell NWs after corresponding stability tests. (a) Ag and (b) Pt for 85% RH, (c) Ag and (d) Pt for 150 °C, (e) Ag and (f) Pt for H<sub>2</sub>O<sub>2</sub>.

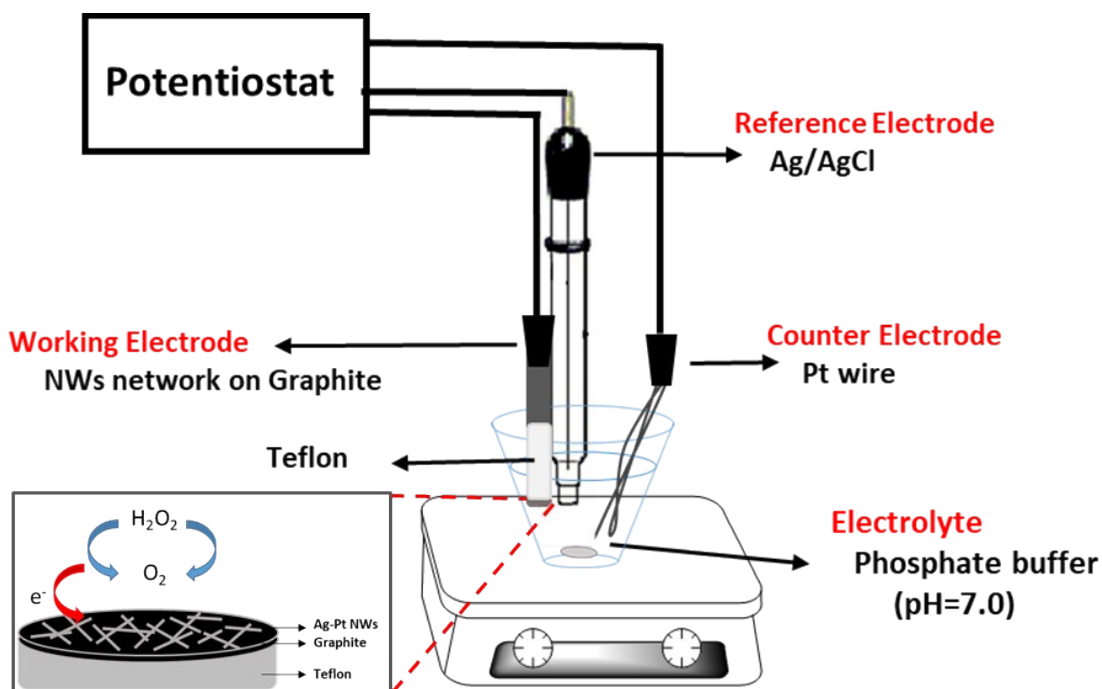

**Figure S6.** A schematic showing the configuration of the Ag-Pt core-shell NWs on graphite electrodes and three-electrode measurement setup used in this work.

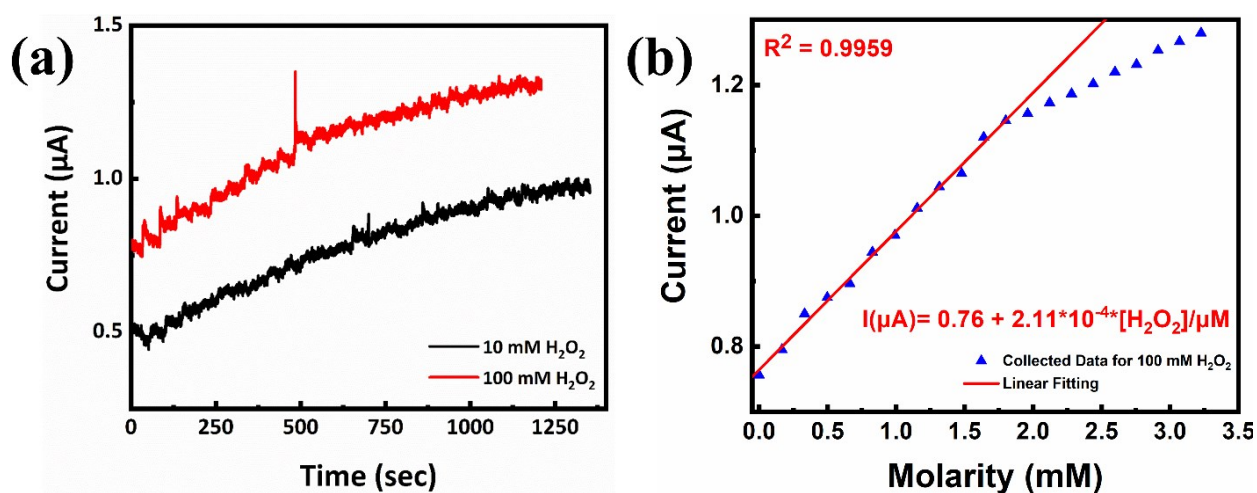

**Figure S7.** (a) Amperometric response of bare Ag NW electrode with the addition of 10 mM (black) and 100 mM (red)  $\text{H}_2\text{O}_2$  to phosphate buffer at an applied potential of +0.8 V (vs. Ag/AgCl) (b) corresponding calibration plot for 10 mM  $\text{H}_2\text{O}_2$  addition with linear regression equation concentration ranging from 756 to 1800  $\mu\text{M}$ .

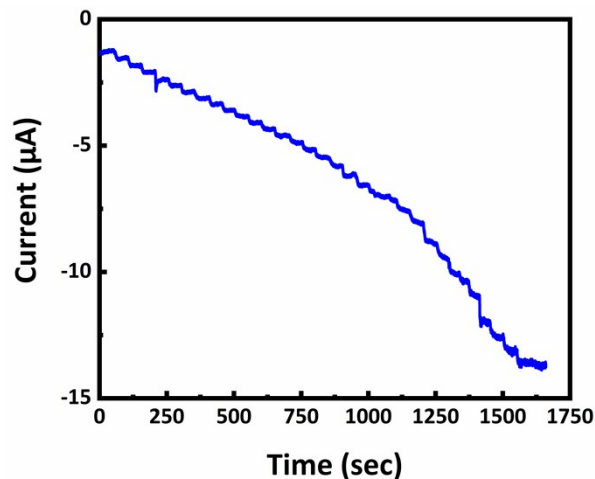

**Figure S8.** Amperometric response of Ag-Pt core-shell NWs electrode with the addition of 100 mM H<sub>2</sub>O<sub>2</sub> to phosphate buffer at an applied potential of 0 V (vs. Ag/AgCl).

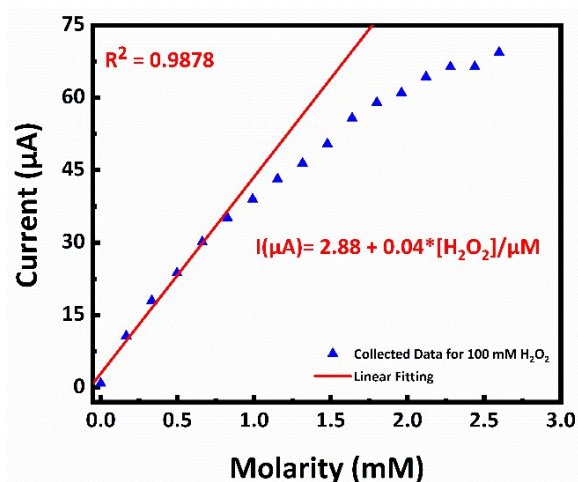

**Figure S9.** Calibration plot of Ag-Pt core-shell NWs electrode for the addition 100 mM H<sub>2</sub>O<sub>2</sub> for concentrations ranging from 182 to 2597 µM.

The electrochemical active surface area (ECSA) of the Ag-Pt core-shell NWs electrode was calculated using Randles-Sevcik equation. Cycling voltammetry measurements with 10-25-50-75-100-200-300 mV/sec were followed using 3-electrode setup where Ag-Pt core-shell NWs on graphite, Pt wire and Ag/AgCl were used as working electrode, counter electrode and reference electrode, respectively. The electrolyte was prepared using 10 mM potassium ferrocyanide (K<sub>4</sub>[Fe(CN)<sub>6</sub>]) in 0.1 M potassium chloride (KCl) and the



potential window of CV was set to 0-0.6 V. The slope of peak current vs square root of scan rate was used in Randles-Sevcik equation which is shown below;

$$i_p = 2.686 \times 10^5 \times n^{3/2} \times A \times D^{1/2} \times C \times \nu^{1/2}$$

where,  $i$  is peak current (A)

$n$  is number of electrons transferred

$A$  is electrode area (cm<sup>2</sup>)

$D$  is Diffusion coefficient (cm<sup>2</sup>/s) ( $6.5 \times 10^{-6}$  cm<sup>2</sup>/s for K<sub>4</sub>[Fe(CN)<sub>6</sub>])

$C$  is concentration (mol/cm<sup>3</sup>)

$\nu$  is scan rate (V/s)

The ECSA of Ag-Pt core-shell NWs electrode was determined as 0.021 cm<sup>2</sup>.
